# Supplementary material for: Characterization of in vivo chemoresistant human hepatocellular carcinoma cells with transendothelial differentiation capacities
Source: BMC Cancer. 2013 Apr 2;13:176. doi: 10.1186/1471-2407-13-176 (PMC3626554; doi:10.1186/1471-2407-13-176)
Supplement: Additional file 2: Table S2 — Used antibodies for immunohistochemistry. [file 1471-2407-13-176-S2.xls]

## Sheet: Tabelle1
Antigen	primary Antibody	secondary Antibody
hum CD31 (PECAM-1)	mouse-anti-hum CD31 (Invitrogen, Carlsbad, USA)	goat-anti-mouse-Cy5 (Jackson, West Grove, USA)
mouse CD31 (PECAM-1)	rat-anti-mouse CD31 (BD, Franklin Lakes, USA)	goat-anti-rat-Alexa 488 (Invitrogen, Carlsbad , USA)
Laminin	rabbit-anti-laminin (Novus, Littleton, USA)	goat-anti-rabbit-Texas Red (Vector, Burlingame, USA)
negative Control hCD31	mouse IgG1 (Dako,Glostrup, Denmark)	goat-anti-mouse-Cy5 (Jackson, West Grove, USA)
negative Control mCD31		goat-anti-rat-Alexa 488 (Invitrogen, Carlsbad , USA)
negative Control Laminin		goat-anti-rabbit-Texas Red (Vector, Burlingame, USA)
